# Supplementary material for: Haploid selection, sex ratio bias, and transitions between sex-determining systems
Source: PubMed Central journal article supplement (PMC6042799; doi:10.1371/journal.pbio.2005609), 2018-06-25
Supplement: pbio.2005609.s004.pdf [file pbio.2005609.s004.pdf]

**Table S1.** Substitutions for different loci orders assuming no interference.

| Order of loci | Substitution                    |
|---------------|---------------------------------|
| SDR-A-M       | $\rho = r(1 - R) + R(1 - r)$    |
| SDR-M-A       | $r = \rho(1 - R) + R(1 - \rho)$ |
| A-SDR-M       | $R = r(1 - \rho) + \rho(1 - r)$ |
