# Supplementary material for: Haploid selection, sex ratio bias, and transitions between sex-determining systems
Source: PubMed Central journal article supplement (PMC6042799; doi:10.1371/journal.pbio.2005609), 2018-06-25
Supplement: pbio.2005609.s005.pdf [file pbio.2005609.s005.pdf]

**Table S2.** Mean fitnesses and zygotic sex ratio in the resident population ( $M$  fixed, XY sex determination)

| Sex & life cycle stage                           | Mean fitness                                                                                                                                                                                                                                                                                                                                                                              |
|--------------------------------------------------|-------------------------------------------------------------------------------------------------------------------------------------------------------------------------------------------------------------------------------------------------------------------------------------------------------------------------------------------------------------------------------------------|
| female gametes ( $\bar{w}_H^\varnothing$ )       | $p_X^\varnothing w_A^\varnothing + (1 - p_X^\varnothing) w_a^\varnothing$                                                                                                                                                                                                                                                                                                                 |
| X-bearing male gametes ( $\bar{w}_{HX}^\delta$ ) | $p_X^\delta w_A^\delta + (1 - p_X^\delta) w_a^\delta$                                                                                                                                                                                                                                                                                                                                     |
| Y-bearing male gametes ( $\bar{w}_{HY}^\delta$ ) | $p_Y^\delta w_A^\delta + (1 - p_Y^\delta) w_a^\delta$                                                                                                                                                                                                                                                                                                                                     |
| male gametes ( $\bar{w}_H^\delta$ )              | $(1 - q) \bar{w}_{HX}^\delta + q \bar{w}_{HY}^\delta$                                                                                                                                                                                                                                                                                                                                     |
| females ( $\bar{w}^\varnothing$ )                | $\frac{[p_X^\varnothing w_A^\varnothing p_X^\delta w_A^\delta w_{AA}^\varnothing + (1 - p_X^\varnothing) w_a^\varnothing p_X^\delta w_A^\delta w_{Aa}^\varnothing + p_X^\varnothing w_A^\varnothing (1 - p_X^\delta) w_a^\delta w_{Aa}^\varnothing + (1 - p_X^\varnothing) w_a^\varnothing (1 - p_X^\delta) w_a^\delta w_{aa}^\varnothing]}{(\bar{w}_H^\varnothing \bar{w}_{HX}^\delta)}$ |
| males ( $\bar{w}^\delta$ )                       | $\frac{[p_X^\varnothing w_A^\varnothing p_Y^\delta w_A^\delta w_{AA}^\delta + (1 - p_X^\varnothing) w_a^\varnothing p_Y^\delta w_A^\delta w_{Aa}^\delta + p_X^\varnothing w_A^\varnothing (1 - p_Y^\delta) w_a^\delta w_{Aa}^\delta + (1 - p_X^\varnothing) w_a^\varnothing (1 - p_Y^\delta) w_a^\delta w_{aa}^\delta]}{(\bar{w}_H^\varnothing \bar{w}_{HY}^\delta)}$                     |
| fraction zygotes male ( $\zeta$ )                | $q [p_Y^\delta w_A^\delta + (1 - p_Y^\delta) w_a^\delta] / \bar{w}_H^\delta$                                                                                                                                                                                                                                                                                                              |
